# Supplementary material for: Validation of the PALM model system 6.0 in a real urban environment: a case study in Dejvice, Prague, the Czech Republic
Source: Copernicus journal article supplement (doi:10.5194/gmd-14-4797-2021), 2021-08-03
Supplement: Supplementary file [file gmd-14-4797-2021-supplement-title-page.pdf › gmd-14-4797-2021-supplement-title-page.pdf]

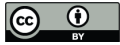

## *Supplement of*

# **Validation of the PALM model system 6.0 in a real urban environment: a case study in Dejvice, Prague, the Czech Republic**

**Jaroslav Resler et al.**

*Correspondence to:* Jaroslav Resler (resler@cs.cas.cz)

- gmd-14-4797-2021-supplement-title-page.pdf
- .page\_content
  - asciidoctor.css
  - ir
    - \* IR-00-1.png
    - \* IR-01-1.png
    - \* IR-01-2.png
    - \* IR-02-1.png
    - \* IR-02-2.png
    - \* IR-02-3.png
    - \* IR-02-4.png
    - \* IR-03-1.png
    - \* IR-03-2.png
    - \* IR-04-1.png
    - \* IR-04-2.png
    - \* IR-04-3.png
    - \* IR-04-4.png
    - \* IR-05-1.png
    - \* IR-05-2.png
    - \* IR-06-1.png
    - \* IR-06-2.png
    - \* IR-06-3-4.png
    - \* IR-07-1.png
    - \* IR-07-2.png
    - \* IR-08-1.png
    - \* IR-08-2.png
    - \* IR-09-1.png

- \* IR-09-2.png
- \* IR-10-123.png
- \* IR-11-1.png
- \* IR-11-2.png
- \* IR-12-1.png
- mv
  - \* Supp\_MM\_PM10.png
  - \* Supp\_MV\_HF.png
  - \* Supp\_MV\_NOx.png
  - \* Supp\_MV\_PM10.png
  - \* Supp\_MV\_PM25.png
  - \* Supp\_MV\_RH.png
  - \* Supp\_MV\_TMP.png
  - \* Supp\_MV\_WV.png
- s\_ghf.html
- s\_rad\_lw\_in.html
- s\_rad\_lw\_out.html
- s\_rad\_net.html
- s\_rad\_sw\_in.html
- s\_rad\_sw\_out.html
- s\_shf.html
- s\_tsurf.html
- supp
  - \* Supp01\_Domain.jpg
  - \* Supp02\_DEM.jpg
  - \* Supp03\_UrbanAtlas.jpg
  - \* Supp04\_IR-proceeding.jpg
  - \* Supp05\_IR-validation.png
  - \* Supp06\_HF.jpg
  - \* Supp07\_MV.jpg
  - \* Supp08\_RH-dron.png
  - \* Supp09\_T-dron.png
  - \* Supp10\_WRF-CAMx.jpg
  - \* Supp11\_parent\_domain\_3d.jpg
  - \* Supp12\_parent\_domain\_gis.png
  - \* Supp13-500hPa.jpg
  - \* Supp14-850hPa.jpg
  - \* Supp15\_soundings\_palm\_summer\_e1.png
  - \* Supp16\_soundings\_palm\_winter\_e1.png
  - \* Supp17\_soundings\_palm\_winter\_e2.png
  - \* Supp18\_CAMx.png
  - \* Supp19\_loc\_11\_1V\_overview.jpg
  - \* Supp20\_loc\_11\_1\_streetview.jpg
  - \* Supp21\_fsv-wind.png
  - \* Supp22\_discretization\_ts.png
  - \* Supp23\_discretization\_prof.png

- surf
  - \* summer\_e2
  - \* winter\_e3
- w\_ghf.html
- w\_rad\_lw\_in.html
- w\_rad\_lw\_out.html
- w\_rad\_net.html
- w\_rad\_sw\_in.html
- w\_rad\_sw\_out.html
- w\_shf.html
- w\_tsurf.html
- index.html

The copyright of individual parts of the supplement might differ from the article licence.
